# Supplementary figures and images for: The Effect of Monomers Number in Peptides on Escherichia Coli Strain Productivity and Inclusion Bodies Quality
Source: Research Square preprint supplement (doi:10.21203/rs.3.rs-8455253/v1), 2026-01-16

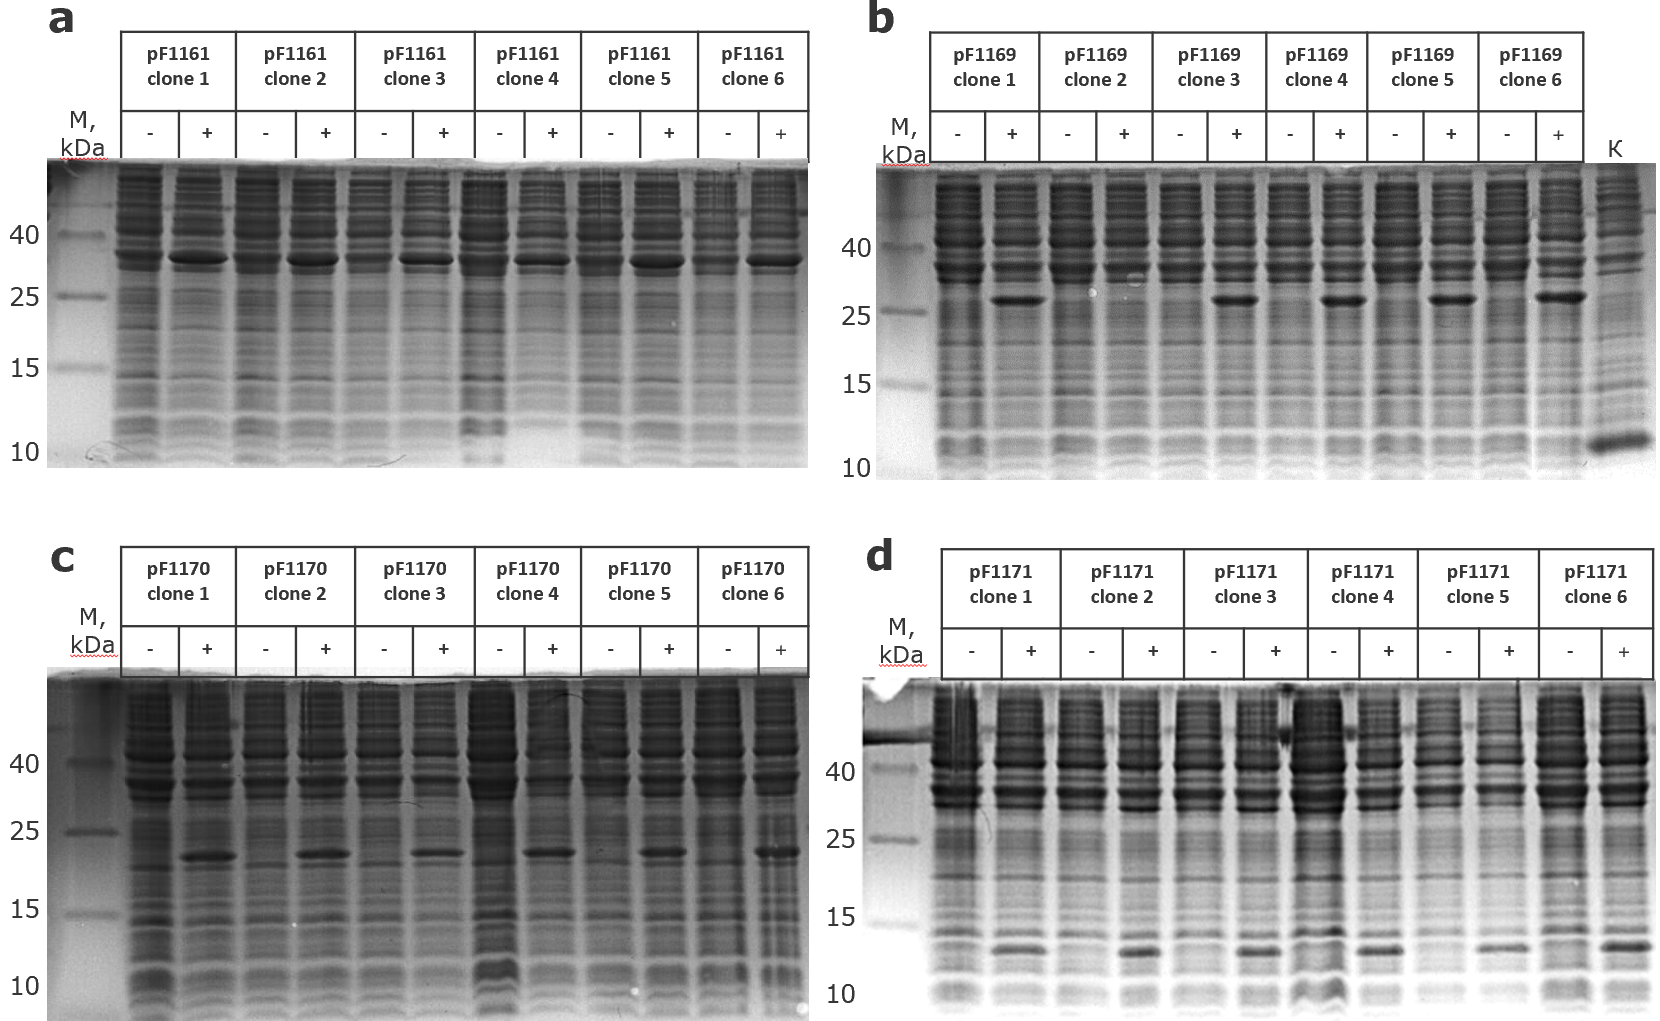


**Fig**. 1 SDS-PAGE of six clones: A - BL21\pF1161; B - BL21\pF1169; C - BL21\pF1170; D - BL21\pF1171

Supplement: Supplementary file 1 [file f4a49c4645ebcb2f61507f74.docx]
